# Supplementary material for: Association of Human FOS Promoter Variants with the Occurrence of Knee-Osteoarthritis in a Case Control Association Study
Source: MDPI journal article supplement (doi:10.3390/ijms20061382), 2019-03-19
Supplement: s1 [file s1]

## Supplementary Materials

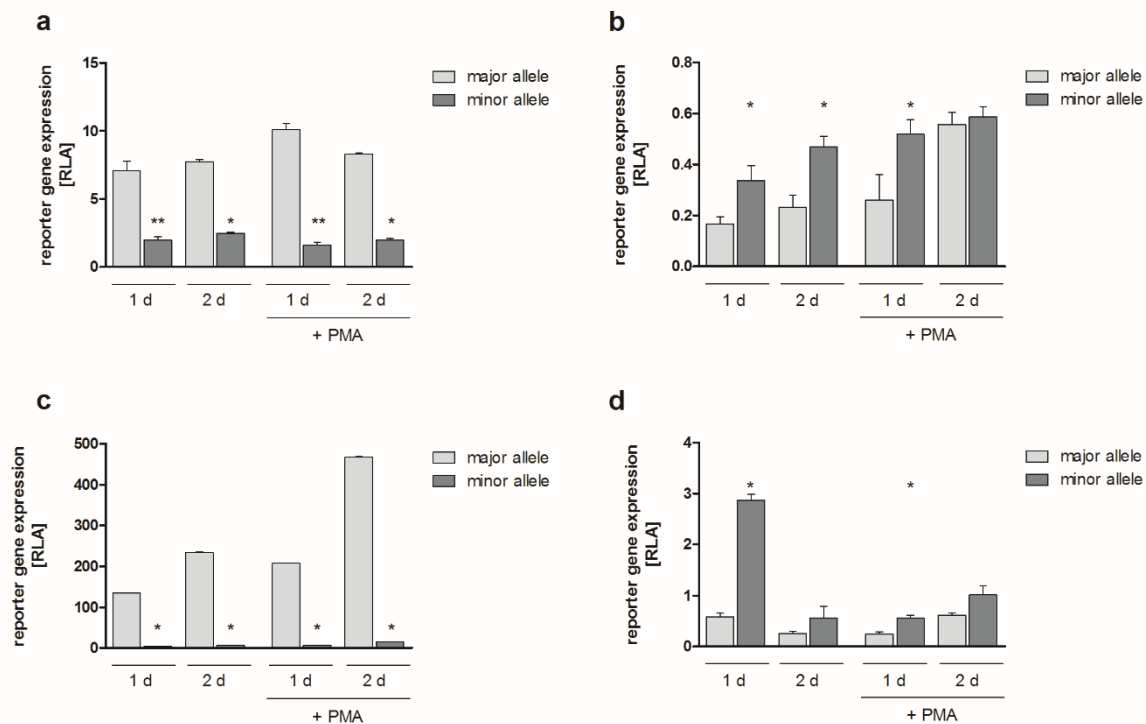

**Figure S1.** Reporter gene expression in K4IM and HeLa cells. The graph shows absolute levels (in RLA) of *JUN* (a, c) and *FOS* (b, d) promoter-dependent expression of firefly luciferase 1d and 2d following transfection of K4IM human fibroblasts (a, b) or HeLa human epithelial cells (c, d), either in non-stimulated cells or in cells stimulated with 10 ng/ml PMA for 8 h (determined in biological triplicates each; in d, 48 h values: duplicates; mean  $\pm$  SEM). Firefly luciferase expression levels were normalized to renilla luciferase expression levels in the respective samples (transfection and normalization control). \*\*  $P \leq 0.005$ , \*  $P \leq 0.05$  compared to the major allele. For *JUN*, the major allele is the rs4647009-deletion, for *FOS*, the major allele refers to the combination of rs7101-T and rs2239615-T.

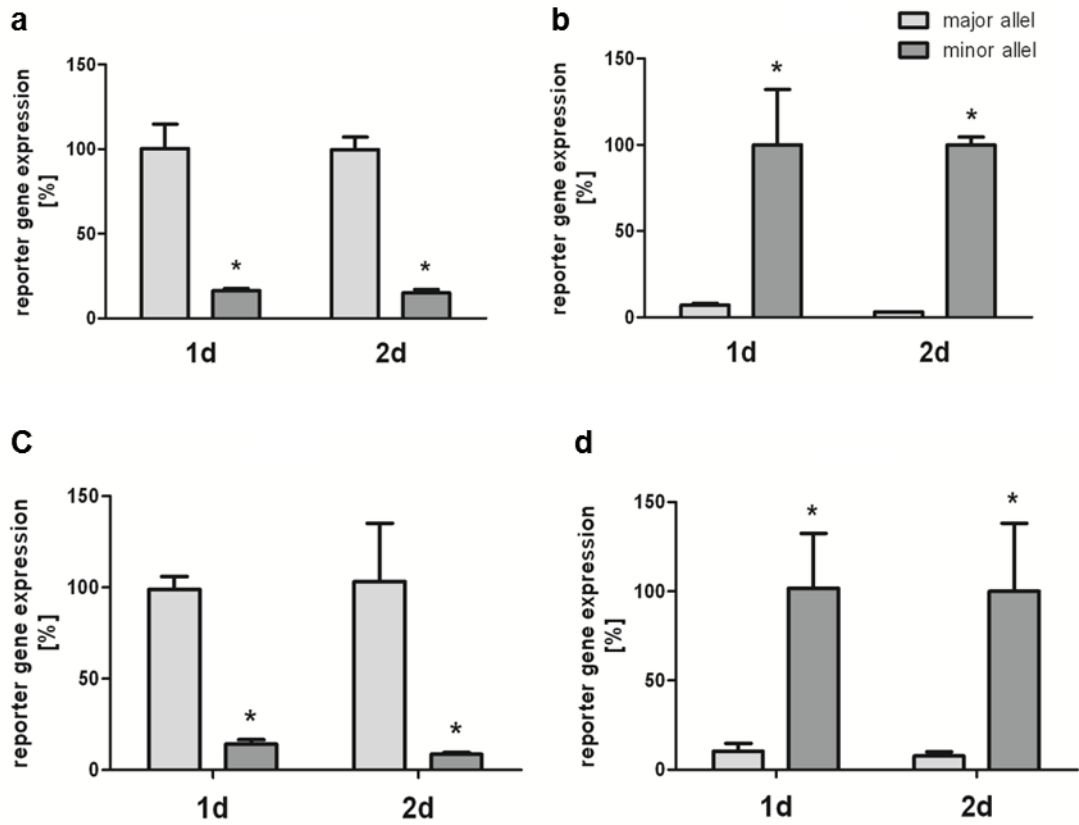

**Figure S2.** Reporter gene expression in NIH3T3 cells. The graph shows *JUN* (a, c) and *FOS* (b, d) promoter-dependent expression of firefly luciferase 1d and 2d following transfection of NIH-3T3 murine embryonic fibroblasts, either (a, b) in non-stimulated cells or (c, d) in cells stimulated with 10 ng/ml PMA for 8h (determined in biological triplicates each). Firefly luciferase expression levels were normalized to renilla luciferase expression levels in the respective samples (transfection and normalization control). Expression levels are shown as relative values (in %). Error bars represent standard errors. \*  $P \leq 0.05$  compared to the major allele.

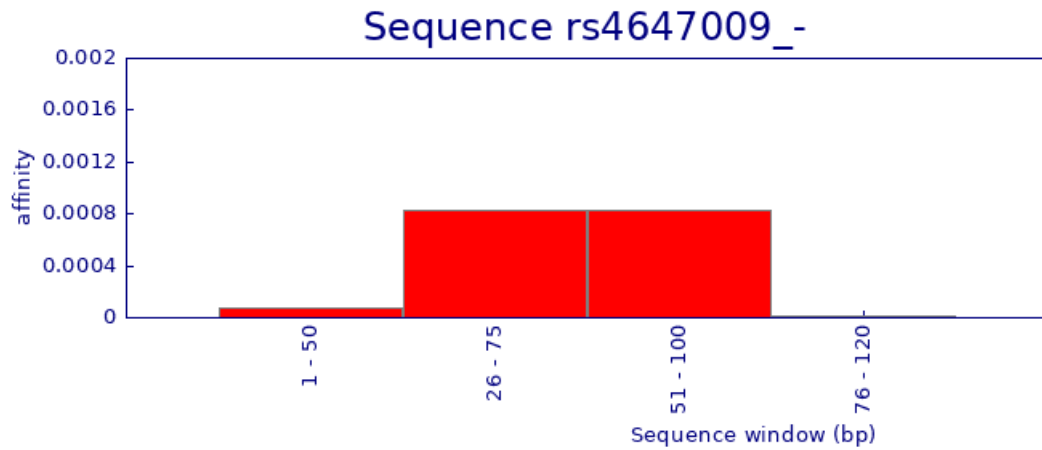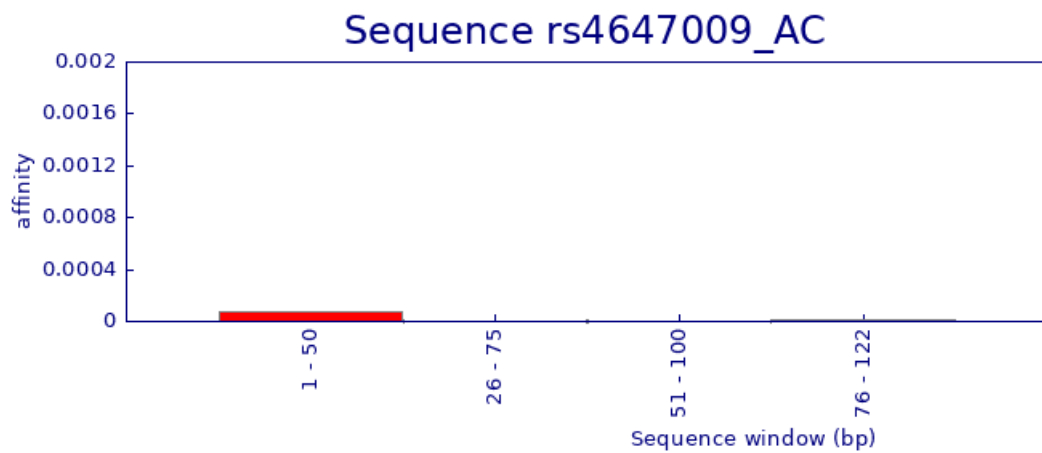

**Figure S3.** Affinity plot showing differential allelic modulation of transcription factor NF- $\kappa$ B binding site (Model ID: M00208) for variant rs4647009. Shown are the results for the major allele (i.e., the deletion „-“; upper plot,  $P=0.02$ ) and for the minor allele (i.e., the insertion „AC“; lower plot,  $P=0.09$ ). Analysis was done using the tool sTRAP with standard-settings (PMID: 20127973; available at [http://trap.molgen.mpg.de/cgi-bin/trap\\_two\\_seq\\_form.cgi](http://trap.molgen.mpg.de/cgi-bin/trap_two_seq_form.cgi)).

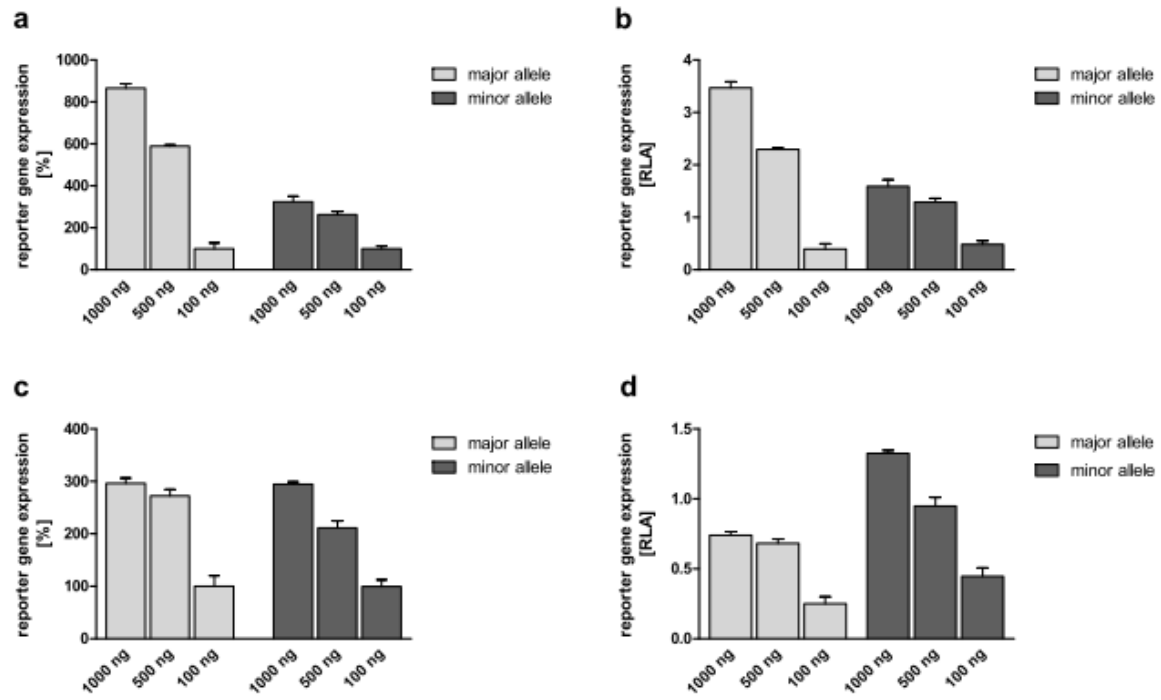

**Figure S4.** Dose response experiments. The graph shows *JUN* (a, b) and *FOS* (c, d) promoter-dependent expression of firefly luciferase 1d after transfection of K4IM human fibroblasts with 1000, 500, or 100 ng vector per well (determined in biological triplicates each; mean  $\pm$  SEM). Firefly luciferase expression levels were normalized to renilla luciferase expression levels. Expression levels are shown as relative values (in %; a, c) and absolute values (in RLA; b, d).

**Table S1.** Validated SNPs in promoter regions (dbSNP build 130)

| Gene        | rs identifier                            | Allelic frequency | Analysed chromosomes | Population | db SNP validation status                                       | Identified in initial screening population |
|-------------|------------------------------------------|-------------------|----------------------|------------|----------------------------------------------------------------|--------------------------------------------|
| <i>FOS</i>  | rs2239615<br>( <b>FOS -135</b> )         | 0.30              | 400                  | Caucasian  | by-cluster,by-frequency                                        | yes                                        |
| <i>FOS</i>  | rs7101<br>( <b>FOS -60</b> )             | 0.26              | 400                  | Caucasian  | by-cluster,by-frequency,by-submitter,by-2hit-2allele,by-hapmap | yes                                        |
| <i>FOS</i>  | rs4645850                                | 0.07              | 120                  | Caucasian  | by-cluster,by-frequency                                        | no                                         |
| <i>FOS</i>  | rs2234706                                | 0.03              | 400                  | Caucasian  | by-cluster,by-frequency                                        | no                                         |
| <i>FOS</i>  | rs4645849                                | 0.02              | 168                  | Global     | by-frequency                                                   | no                                         |
| <i>FOS</i>  | rs4645852                                | 0.01              | 138                  | Global     | by-frequency                                                   | no                                         |
| <i>JUN</i>  | <b>rs4647001</b><br>( <b>JUN -1676</b> ) | 0.39              | 156                  | Global     | by-cluster,by-frequency,by-2hit-2allele                        | yes                                        |
| <i>JUN</i>  | rs4646999                                | 0.33              | 48                   | Caucasian  | by-cluster,by-frequency,by-2hit-2allele                        | no                                         |
| <i>JUN</i>  | rs4647002                                | 0.05              | 172                  | Global     | by-cluster,by-frequency                                        | no                                         |
| <i>JUN</i>  | rs4647000                                | 0.04              | 168                  | Global     | by-cluster,by-frequency                                        | no                                         |
| <i>JUN</i>  | rs4647009<br>( <b>JUN -617/-618</b> )    | 0.03              | 62                   | Caucasian  | by-cluster,by-frequency                                        | yes                                        |
| <i>JUN</i>  | rs2760499                                | 0.03              | 162                  | Global     | by-cluster,by-frequency                                        | no                                         |
| <i>JUN</i>  | rs4647011                                | 0.02              | 156                  | Global     | by-frequency                                                   | no                                         |
| <i>JUN</i>  | rs4647003                                | 0.01              | 166                  | Global     | by-frequency                                                   | no                                         |
| <i>JUNB</i> | rs17886698                               | 0.04              | 170                  | Global     | by-frequency                                                   | no                                         |
| <i>JUNB</i> | rs17881432                               | 0.04              | 156                  | Global     | by-frequency                                                   | no                                         |
| <i>JUNB</i> | rs17878468                               | 0.03              | 166                  | Global     | by-frequency                                                   | no                                         |

| Gene         | rs identifier | Allelic frequency | Analysed chromosomes | Population | db SNP validation status                          | Identified in initial screening population |
|--------------|---------------|-------------------|----------------------|------------|---------------------------------------------------|--------------------------------------------|
| <i>JUNB</i>  | rs17883538    | 0.02              | 170                  | Global     | by-frequency                                      | no                                         |
| <i>JUN D</i> | rs41523455    | 0.39              | 44                   | Caucasian  | by-frequency                                      | no                                         |
| <i>JUN D</i> | rs7247222     | 0.36              | 44                   | Caucasian  | by-cluster,by-frequency                           | no                                         |
| <i>JUN D</i> | rs7247237     | 0.25              | 44                   | Caucasian  | by-cluster,by-frequency                           | no                                         |
| <i>JUN D</i> | rs7247767     | 0.25              | 44                   | Caucasian  | by-cluster,by-frequency                           | no                                         |
| <i>JUN D</i> | rs41507248    | 0.25              | 44                   | Caucasian  | by-frequency                                      | no                                         |
| <i>JUN D</i> | rs41519246    | 0.21              | 44                   | Caucasian  | by-frequency                                      | no                                         |
| <i>JUN D</i> | rs41374745    | 0.18              | 44                   | Caucasian  | by-frequency                                      | no                                         |
| <i>JUN D</i> | rs6512255     | 0.17              | 120                  | Caucasian  | by-cluster,by-frequency,by-2hit-2allele,by-hapmap | no                                         |

Bold SNPs were identified in the initial screening study (50 chromosomes) consisting of RA, OA, and NC samples.

**Table S2.** Clinical characteristics of the donors

|                                                  | normal controls (NC)    | osteoarthritis (OA)     | rheumatoid arthritis (RA) |
|--------------------------------------------------|-------------------------|-------------------------|---------------------------|
| donors (n)                                       | 484                     | 277                     | 298                       |
| gender (female/male)                             | 226/258                 | 204/84                  | 216/82                    |
| age (years $\pm$ SEM)                            | 41.2 $\pm$ 0.5          | 69.1 $\pm$ 0.5          | 59.7 $\pm$ 0.7            |
| disease duration (years $\pm$ SEM)               | -                       | 5.9 $\pm$ 0.4 (n.d.: 5) | 11.5 $\pm$ 0.6 (n.d.: 2)  |
| rheumatoid factor (positive/negative/n.d.)       | 0/0/484                 | 21/267/0                | 219/54/25                 |
| ESR <sup>1</sup> (mm/h $\pm$ SEM)                | n.d.                    | 16.4 $\pm$ 0.8          | 26.4 $\pm$ 1.2 (n.d.: 4)  |
| CRP <sup>2</sup> (mg/l $\pm$ SEM)                | n.d.                    | 7.6 $\pm$ 1.3           | 17.3 $\pm$ 1.4 (n.d.: 17) |
| ARA <sup>3</sup> - criteria for RA (n $\pm$ SEM) | n.d.                    | 0.1 $\pm$ 0.01          | 4.7 $\pm$ 0.1 (n.d.: 2)   |
| Concomitant medication <sup>4</sup>              | MTX <sup>5</sup> (n)    | -                       | 0                         |
|                                                  | Steroids                | -                       | 2                         |
|                                                  | NSAIDs <sup>6</sup> (n) | -                       | 141                       |

n.d. not determined

<sup>1</sup> Erythrocyte sedimentation rate

<sup>2</sup> C-reactive protein, normal range: < 5 mg/l

<sup>3</sup> American Rheumatism Association (now: American College of Rheumatology)

<sup>4</sup> n.d.: 8 (RA)

<sup>5</sup> Methotrexate

<sup>6</sup> non-steroidal anti-inflammatory drugs

**Table S3.** Clinical characteristics of the replication cohort <sup>1</sup>.

|                                            |                                             | normal controls (NC) | osteoarthritis (OA) |
|--------------------------------------------|---------------------------------------------|----------------------|---------------------|
| donors (n)                                 |                                             | 548                  | 72                  |
| gender (female/male)                       |                                             | 276/272              | 48/24               |
| age (years $\pm$ SD)                       |                                             | 58.9 $\pm$ 6.8       | 62.3 $\pm$ 7.5      |
| disease duration (years $\pm$ SD)          |                                             |                      | 7.9 $\pm$ 9.1       |
| rheumatoid factor (positive/negative/n.d.) |                                             | 0 / 548 / 0          | 0 / 72 / 0          |
| CRP <sup>2</sup> (mg/l $\pm$ SD)           |                                             | 2.1 $\pm$ 5.3        | 3.2 $\pm$ 3.6       |
| Rheumatoid arthritis <sup>3</sup>          |                                             | 0                    | 0                   |
| Concomitant medication <sup>4</sup>        | MTX <sup>5</sup> (n)                        | 0                    | 0                   |
|                                            | Beta-agonist and corticosteroid combination | 0                    | 0                   |
|                                            | Systemic corticosteroids                    | 0                    | 0                   |
|                                            | Inhaled corticosteroids                     | 0                    | 7                   |
|                                            | NSAID <sup>6</sup>                          | 0                    | 42                  |

<sup>1</sup> Additional information regarding selection of individuals from the “Genmets” study can be found in section Material and Methods

<sup>2</sup> C-reactive protein, normal range: < 5 mg/l

<sup>3</sup> Diagnostic details as described in <sup>44</sup>

<sup>4</sup> Regular or irregular use at the time of investigation for any reason

<sup>5</sup> Methotrexate

<sup>6</sup> non steroidal anti-inflammatory drugs, includes prescribed and over-the-counter



**Table 4.** Association analysis of rs2239615/rs7101 in *FOS* with knee-OA in the replication cohort without excluding individuals using NSAIDs, systemic/inhaled corticosteroids, and/or having elevated levels of rheumatoid factor (RF >30 IU/ml) (in total 893 NC and 75 knee-OA individuals).

|                                    | NC cohort | OA cohort      |
|------------------------------------|-----------|----------------|
| Homozygous minor (C/C)             | 31        | 4              |
| Heterozygous (C/T)                 | 279       | 35             |
| Homozygous major (T/T)             | 583       | 36             |
| HWE <i>P</i> -value                | 0.82      | 0.27           |
| allelic OR (95% CI)                |           | 1.70 (1.2-2.5) |
| allelic OR - <i>P</i> -value       |           | 0.0074         |
| Minor Recessive OR (95% CI)        |           | 1.57 (0.5-4.6) |
| Minor Recessive OR <i>P</i> -value |           | 0.34           |

#### Supplement

**Table S5.** primer sequences and specific PCR conditions for NIRCA analyses (cloning into vector pUC 19). primer forward: binding site for T7 RNA polymerase + *Eco* RI restriction site + sequence for primer binding; primer reverse: binding site for T7 RNA polymerase + *Bam* HI restriction + sequence for primer binding.

| promoter                | primer forward (5'→3')                               | primer reverse (3'→5')                                | product (bp) | amplification protocol (45 cycles)                                                       |
|-------------------------|------------------------------------------------------|-------------------------------------------------------|--------------|------------------------------------------------------------------------------------------|
| <i>JUN</i> promoter I   | 5'- AGAGCCTGGTCTCCAGCCGCCCC - 3'<br>(position: -779) | 5'- TGCCCGTTGCTGGACTGGATTATC - 3'<br>(position: +260) | 1039         | denaturation: 45 s, 95°C,<br>primer annealing: 45 s, 60°C,<br>amplification: 180 s, 72°C |
| <i>JUN</i> promoter II  | 5'- ACCGTCGCTCCTGAA - 3'<br>(position: -1736)        | 5'- GCCACTTGTCTCCGGGT - 3'<br>(position: -619)        | 1117         | denaturation: 45 s, 95°C,<br>primer annealing: 45 s, 55°C,<br>amplification: 180 s, 72°C |
| <i>JUNB</i> promoter I  | 5'- TCCTCCGTCTGTGAAAATTCCAG - 3'<br>(position: -842) | 5'- CGCTTTGAGACTCCGGTAGGGGTC - 3'<br>(position: +156) | 1050         | denaturation: 45 s, 95°C,<br>primer annealing: 45 s, 53°C,<br>amplification: 180 s, 72°C |
| <i>JUNB</i> promoter II | 5'- CCTGTGCCCTAATATGGGCGGC - 3'<br>(position: -1831) | 5'- TCCCAGTATGTGCGAAGAAACC - 3'<br>(position: -640)   | 1192         | denaturation: 45 s, 95°C,<br>primer annealing: 45 s, 56°C,<br>amplification: 180 s, 72°C |

| <b>promoter</b>         | <b>primer forward (5'→3')</b>                        | <b>primer reverse (3'→5')</b>                         | <b>product (bp)</b> | <b>amplification protocol (45 cycles)</b>                                                  |
|-------------------------|------------------------------------------------------|-------------------------------------------------------|---------------------|--------------------------------------------------------------------------------------------|
| <i>JUND</i> promoter I  | 5'- AGATCGGTCGTACACAGCGGT -3'<br>(position: -400)    | 5'- CAGCGTCAGCGCGTCCTTCTTCATC -3'<br>(position: +156) | 556                 | Denaturation: 45 s, 95°C,<br>primer annealing: 45 s, 59°C,<br>amplification: 180 s, 72°C   |
| <i>JUND</i> promoter II | 5'- CCATTCTATGCGAGGCCCTGTCA -3'<br>(position: -1629) | 5'- GCGTGATGGGCCCCGGGCCAC -3'<br>(position: -438)     | 1192                | denaturation: 45 s, 95°C,<br>primer annealing: 45 s, 57,8°C,<br>amplification: 180 s, 72°C |
| <i>FOS</i> promoter I   | 5' - CATATTAGGACATCTGCGTC - 3'<br>(position: -468)   | 5'- CTGCGCGTTGACAGGCGAGCC -3'<br>(position: +141)     | 609                 | denaturation: 45 s, 95°C,<br>primer annealing: 45 s, 56°C,<br>amplification: 90 s, 72°C    |
| <i>FOS</i> promoter II  | 5' - CACCCCCTTCAAATGTCTTC - 3'<br>(position: -1109)  | 5'- GGTTTCGGGGATGGCT -3'<br>(position: -395)          | 715                 | denaturation: 45 s, 95°C,<br>primer annealing: 45 s, 45,5°C,<br>amplification: 90 s, 72°C  |
| <i>FOS</i> promoter III | 5' - AGCCCCGTGTTCCAGGACGTG - 3'<br>(position: -1410) | 5'- AGACCTTCATCCCCTAACCTC -3'<br>(position: -830)     | 581                 | denaturation: 45 s, 95°C,<br>primer annealing: 45 s, 60°C,<br>amplification : 90 s, 72°C   |
| <i>FOS</i> promoter IV  | 5' - GTTCCACGAATCCCCGCCTC - 3'<br>(position: -2008)  | 5'- AGGGTGGAGGACGGGGGCTG -3'<br>(position: -1305)     | 704                 | denaturation: 45 s, 95°C,<br>primer annealing: 45 s, 65°C,<br>amplification: 90 s, 72°C    |

bp: base pairs; position +1: first base of the start codon ATG

**Table S6. primer sequences and specific PCR conditions for functional analyses (cloning into vector pUBT-luc).**

primer forward: *Hind* III restriction site + sequence for primer binding

primer reverse: *Not* I restriction + sequence for primer binding

| <b>promoter</b>        | <b>primer forward (5'→3')</b>                          | <b>primer reverse (3'→5')</b>                    | <b>product</b><br>(bp) | <b>amplification protocol</b><br>(45 cycles)                                             |
|------------------------|--------------------------------------------------------|--------------------------------------------------|------------------------|------------------------------------------------------------------------------------------|
| <i>JUN</i> -promotor I | 5'- AGAGCCTTGCTCTCCAGCCGGCCCC - 3'<br>(Position: -779) | 5'- AGAACAGTCCGTCAC TTCAC - 3'<br>(Position: -1) | 779                    | denaturation: 45 s, 95°C,<br>primer annealing: 45 s, 58°C,<br>amplification: 180 s, 72°C |
| <i>JUN</i> promotor II | 5'- ACCGTCGCTCCTGAA - 3'<br>(Position: -1736)          | 5'- GCCACTTGCTCTCCGGGT - 3'<br>(Position: -619)  | 1118                   | denaturation: 45 s, 95°C,<br>primer annealing: 45 s, 50°C,<br>amplification: 180 s, 72°C |
| <i>FOS</i> promotor I  | 5'- CATATTAGGACATCTGCGTC - 3'<br>(Position: -468)      | 5'- CGTGGCGGTTAGGCAAAGCCG - 3'<br>(Position: -1) | 468                    | denaturation: 45 s, 95°C,<br>primer annealing: 45 s, 50°C,<br>amplification: 90 s, 72°C  |

bp: base pairs; position +1: first base of the start codon ATG

**Table S7: primer sequences and specific conditions for genotyping**

| gene       | position  | rs number | PCR primer forward<br>(5'→3')                       | PCR primer reverse<br>(3'→5')                  | product<br>(bp) | amplification protocol<br>(45 cycles)                                                   | Genotyping<br><br>Primer                    | genotyping protocol<br>(44 cycles)                                                      |
|------------|-----------|-----------|-----------------------------------------------------|------------------------------------------------|-----------------|-----------------------------------------------------------------------------------------|---------------------------------------------|-----------------------------------------------------------------------------------------|
| <i>FOS</i> | -135      | rs2239615 | 5'-<br>ACGTTGGATGCTC<br>ATTCATAAAACGC<br>TTGTTA- 3' | 5'-<br>ACGTTGGATGGGC<br>TCAGTCTTGGCTTC<br>- 3' | 115             | denaturation: 45 s, 95°C,<br>primer annealing: 45 s, 58°C,<br>amplification: 45 s, 72°C | 5'-<br>bioCCGCATCT[<br>L]CAGCGAGCA<br>- 3'  | denaturation: 10 s, 94°C,<br>primer annealing: 30 s, 60°C,<br>amplification: 10 s, 72°C |
| <i>FOS</i> | -60       | rs7101    | 5'-<br>ACGTTGGATGAGC<br>GAACGAGCAGTGA<br>C- 3'      | 5'-<br>ACGTTGGATGATC<br>ATCGTGGCGGTTA<br>G- 3' | 124             | denaturation: 45 s, 95°C,<br>primer annealing: 45 s, 58°C,<br>amplification: 45 s       | 5'-<br>bioAGA[L]AGG<br>TGGGCGCTGT<br>G- 3'  | denaturation: 10 s, 94°C,<br>primer annealing: 30 s, 60°C,<br>amplification: 10 s, 72°C |
| <i>JUN</i> | -617 -618 | rs4647009 | 5'-<br>ACGTTGGATGTGC<br>AGCAGCAAAGAA<br>CTT- 3'     | 5'-<br>ACGTTGGATGCAG<br>GAAAGGCTTGCAA<br>A- 3' | 103             | denaturation: 45 s, 95°C,<br>primer annealing: 45 s, 58°C,<br>amplification: 45 s       | 5'-<br>bioAGT[L]GGCT<br>CCGGGACTCT<br>G- 3' | denaturation: 10 s, 94°C,<br>primer annealing: 30 s, 60°C,<br>amplification: 10 s, 72°C |

bio: biotin, (L): photo cleavable linker. bp: base pair
